# Supplementary material
Source: MDPI journal article supplement (https://www.mdpi.com/2571-9408/5/3/100)
Supplement: s1 [file s1]

Supplementary figures and animated GIFs

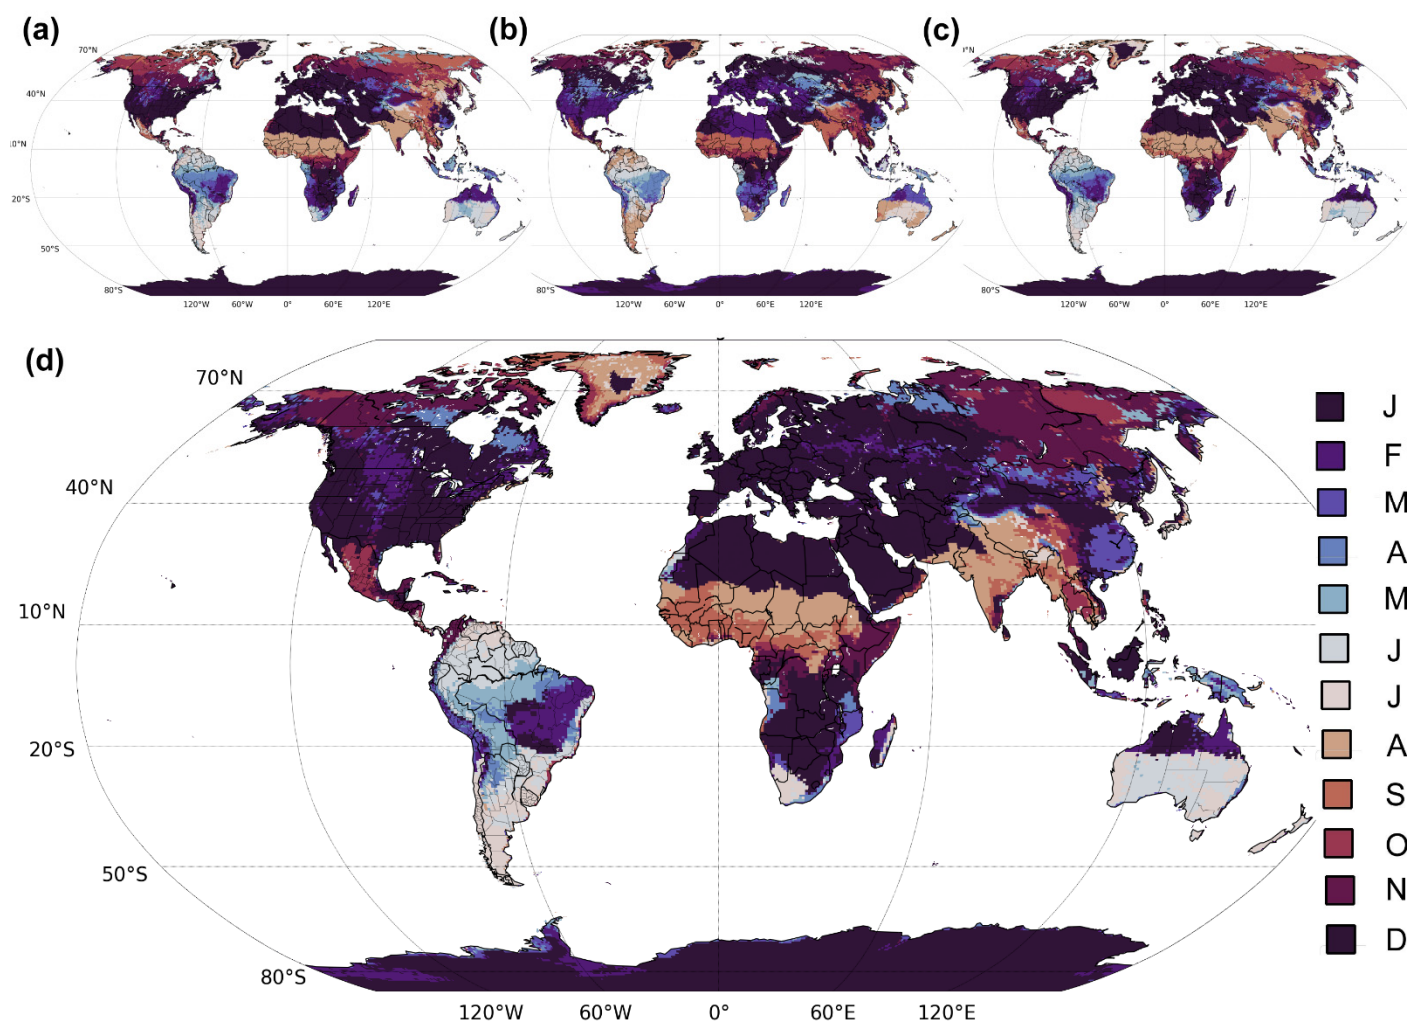

Figure S1: Modal month with the maximum monthly RH for the periods (a) 1850-1879, (b) 1984-2013, (c) 2025-2054 and (d) 2070-2099

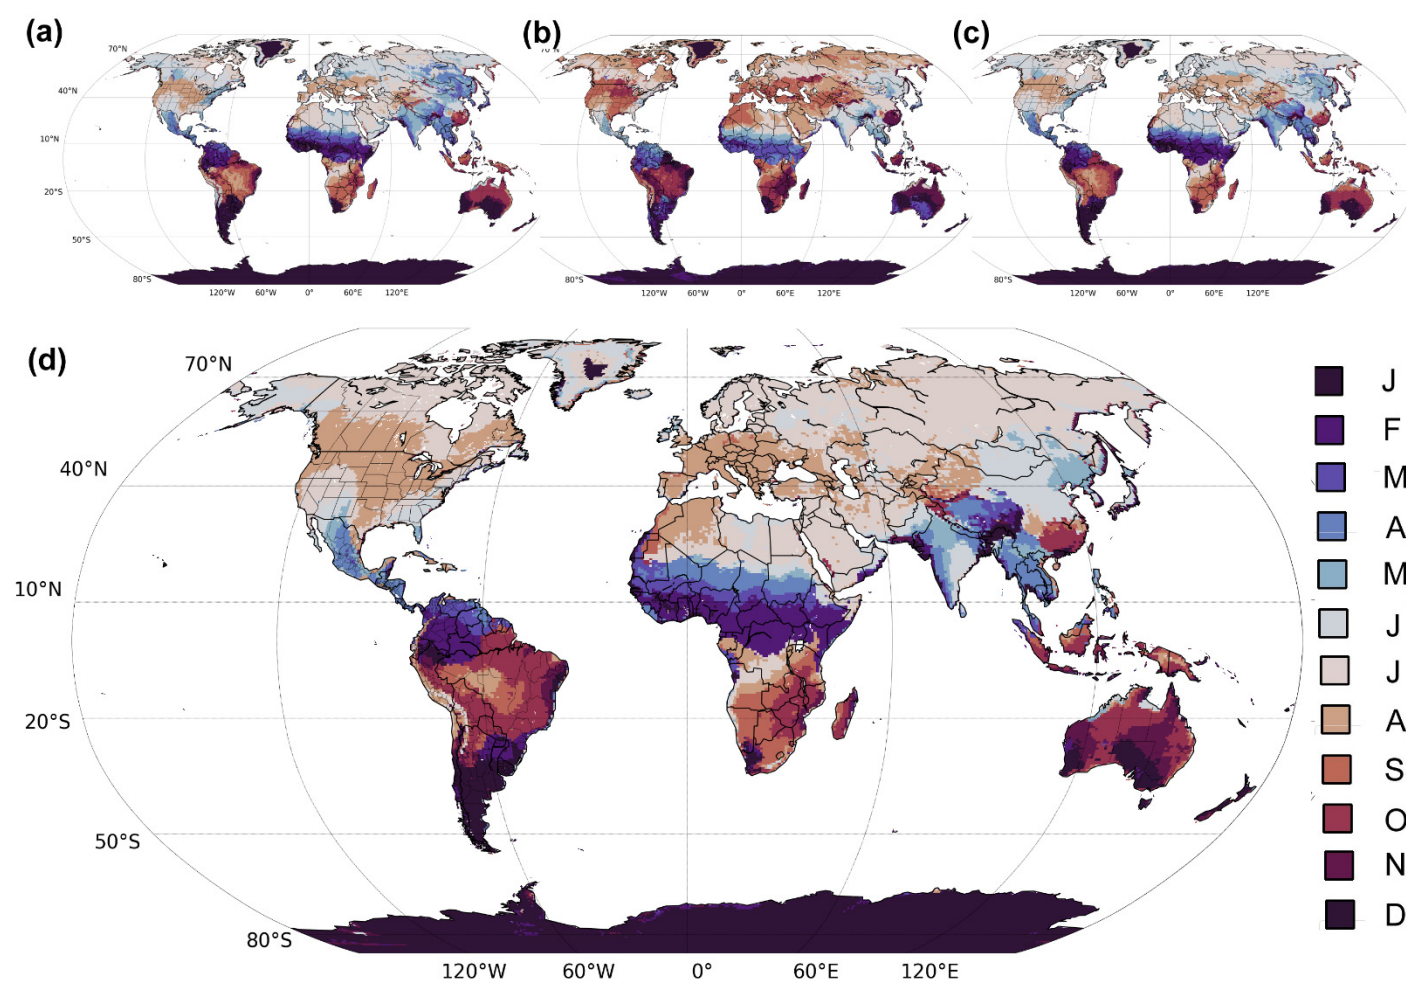

Figure S2: Modal month with the minimum monthly RH for the periods (a) 1850-1879, (b) 1984-2013, (c) 2025-2054 and (d) 2070-2099

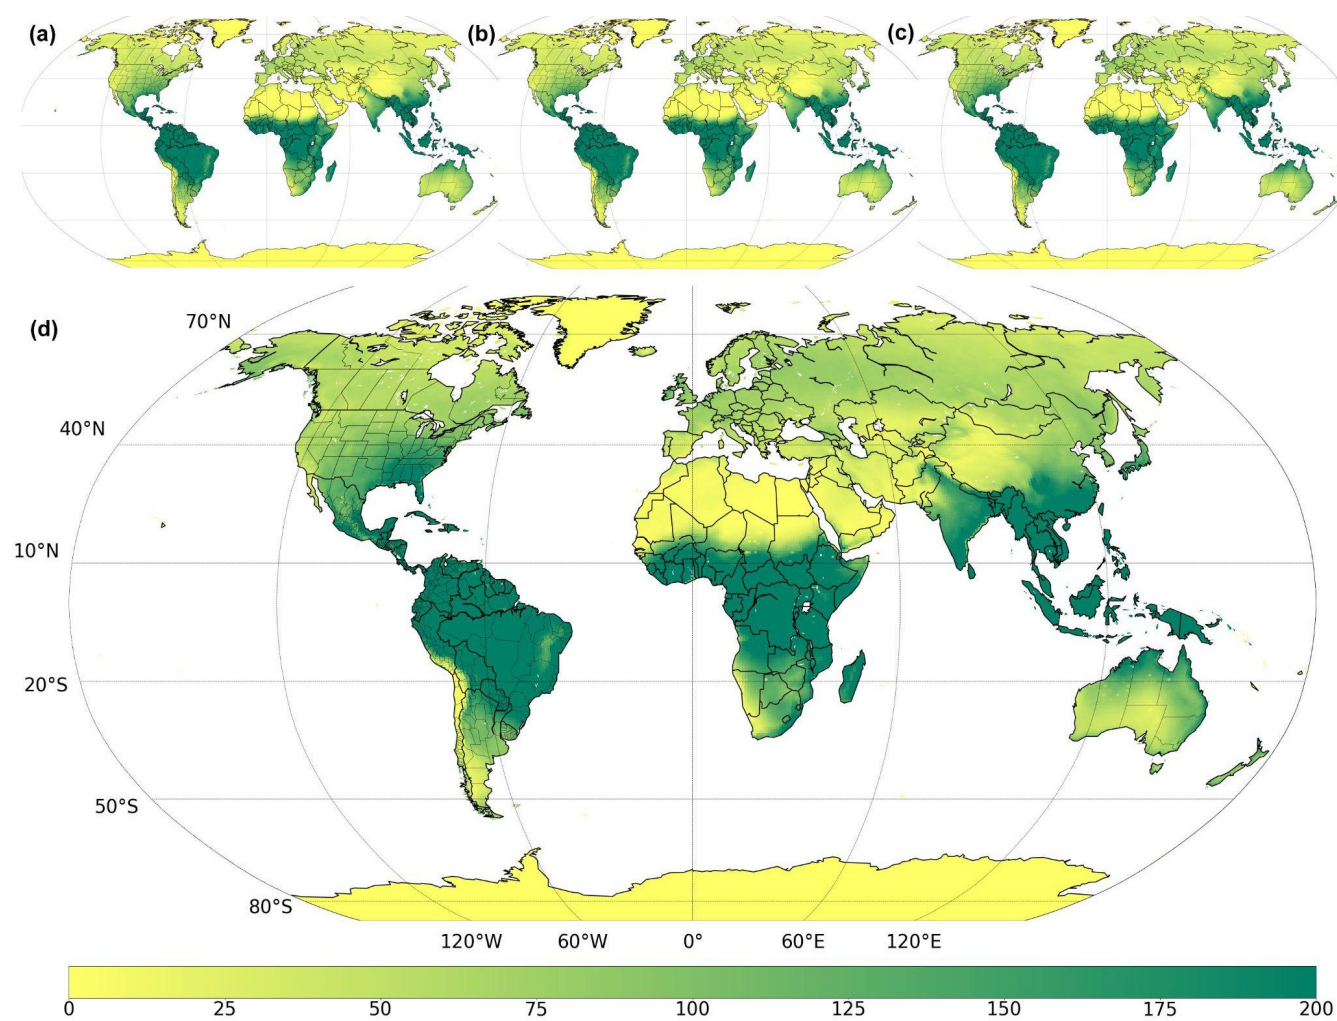

Figure S3: Scheffer Index for the periods (a) 1850-1879, (b) 1984-2013, (c) 2025-2054 and (d) 2070-2099

#### Videos of maps as animated GIFs

Video S1: Animated GIF of Figure 1 showing RH range (a) 1850-1879, (b) 1984-2013, (c) 2025-2054 and (d) 2070-2099

Video S2: Animated GIF of Figure 3 showing modal month with the maximum monthly RH for the periods (a) 1850-1879, (b) 1984-2013, (c) 2025-2054 and (d) 2070-2099.

Video S3: Animated GIF allied to Figure 3 showing modal month with the minimum monthly RH for the periods (a) 1850-1879, (b) 1984-2013, (c) 2025-2054 and (d) 2070-2099.

Video S4: Animated GIF of Figure 4 showing ToW for the periods (a) 1850-1879, (b) 1984-2013, (c) 2025-2054 and (d) 2070-2099.

Video S5: Animated GIF of Figure 5 showing WDR for the periods (a) 1850-1879, (b) 1984-2013, (c) 2025-2054 and (d) 2070-2099.

Video S6: Animated GIF of Figure 7 showing salt transitions for the periods (a) 1850-1879, (b) 1984-2013, (c) 2025-2054 and (d) 2070-2099.

Video S7: Animated GIF of Figure 8 showing the Scheffer Index for the periods (a) 1850-1879, (b) 1984-2013, (c) 2025-2054 and (d) 2070-2099.

Video S8: Animated GIF of Figure 10 showing combined pressures for the periods (a) 1850-1879, (b) 1984-2013, (c) 2025-2054 and (d) 2070-2099.
